# Supplementary material for: Resistance of Ion Exchange Membranes in Aqueous Mixtures of Monovalent and Divalent Ions and the Effect on Reverse Electrodialysis
Source: MDPI journal article supplement (doi:10.3390/membranes13030322), 2023-03-10
Supplement: s1 [file s1]

# Supporting Information to: Resistance of ion exchange membranes in aqueous mixtures of monovalent and divalent ions and the effect on reverse electro-dialysis

Joost Veerman <sup>1</sup>, Lucía Gómez-Coma <sup>2</sup>, Alfredo Ortiz <sup>2</sup> and Inmaculada Ortiz <sup>2,\*</sup>

<sup>1</sup> REDstack bv, Graaf Adolfstraat 35-G, 8606 BT Sneek, The Netherlands

<sup>2</sup> Department of Chemical and Biomolecular Engineering, University of Cantabria, Av. Los Castros 46, 39005 Santander, Spain

\* Correspondence: ortizi@unican.es

## 1. Composition of the solutions used for testing FKS-50 and FAS-50 as presented in Figure 5.

Source: Gómez-Coma et al. 2019 [1].

| Exp | NaCl (M)           | MgCl <sub>2</sub> (M) | CaCl <sub>2</sub> (M) | Rarea (Ω·cm <sup>2</sup> ) |
|-----|--------------------|-----------------------|-----------------------|----------------------------|
| 1   | 6·10 <sup>-4</sup> | 0                     | 0                     | 1.92                       |
| 2   | 0.02               | 0                     | 0                     | 1.34                       |
| 3   | 0.02               | 1·10 <sup>-4</sup>    | 0                     | 2.36                       |
| 4   | 0.02               | 1·10 <sup>-3</sup>    | 0                     | 4.87                       |
| 5   | 0.02               | 0                     | 1·10 <sup>-4</sup>    | 2.04                       |
| 6   | 0.02               | 0                     | 1·10 <sup>-3</sup>    | 4.40                       |
| 7   | 0.02               | 0                     | 5·10 <sup>-3</sup>    | 5.81                       |
| 8   | 6·10 <sup>-4</sup> | 2.86·10 <sup>-4</sup> | 1.19·10 <sup>-3</sup> | 5.47                       |
| 9   | 0.02               | 2.4·10 <sup>-3</sup>  | 1.5·10 <sup>-3</sup>  | 5.46                       |
| 10  | 0.043              | 1.1·10 <sup>-3</sup>  | 2.0·10 <sup>-4</sup>  | 3.56                       |
| 11  | 0.55               | 0                     | 0                     | 1.05                       |
| 12  | 1                  | 0                     | 0                     | 1.11                       |
| 13  | 1                  | 0.05                  | 0                     | 2.14                       |
| 14  | 1                  | 0.1                   | 0                     | 2.53                       |
| 15  | 1                  | 0.2                   | 0                     | 2.72                       |
| 16  | 1                  | 0                     | 0.01                  | 1.93                       |
| 17  | 1                  | 0                     | 0.02                  | 2.03                       |
| 18  | 1                  | 0                     | 0.1                   | 2.91                       |

**Table S1.** Resistances of FKS-50 measured at 297±1 K

**Citation:** Veerman, J.; Gómez-Coma, L.; Ortiz, A.; Ortiz, I. Resistance of Ion Exchange Membranes in Aqueous Mixtures of Monovalent and Divalent Ions and the Effect on Reverse Electrodialysis. *Membranes* **2023**, *13*, 322. <https://doi.org/10.3390/membranes13030322>

Academic Editors: Liliana C. Tomé, Luisa A. Neves and Isabel Coelho

Received: 16 January 2023

Revised: 1 March 2023

Accepted: 6 March 2023

Published: 10 March 2023

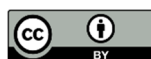

**Copyright:** © 2023 by the authors. Licensee MDPI, Basel, Switzerland. This article is an open access article distributed under the terms and conditions of the Creative Commons Attribution (CC BY) license (<https://creativecommons.org/licenses/by/4.0/>).

| Exp | NaCl (M)           | Na <sub>2</sub> SO <sub>4</sub> (M) | R <sub>area</sub> (Ω·cm <sup>2</sup> ) |
|-----|--------------------|-------------------------------------|----------------------------------------|
| 1   | 6·10 <sup>-4</sup> | 0                                   | 1.78                                   |
| 2   | 0.02               | 0                                   | 1.42                                   |
| 3   | 0.02               | 1·10 <sup>-4</sup>                  | 1.79                                   |
| 4   | 0.02               | 1·10 <sup>-3</sup>                  | 1.99                                   |
| 5   | 0.02               | 5·10 <sup>-3</sup>                  | 2.04                                   |
| 6   | 0.55               | 0                                   | 1.11                                   |
| 7   | 1                  | 0                                   | 1.22                                   |
| 8   | 1                  | 0.01                                | 1.23                                   |
| 9   | 1                  | 0.06                                | 1.27                                   |
| 10  | 1                  | 0.1                                 | 1.31                                   |

**Table S2.** Resistances of FAS-50 measured at 297±1 K**2. Composition of the solutions used for testing CMX as presented in Figure 6.**

Source: Galama et al. 2014 [2].

| Exp | NaCl (M) | R <sub>area</sub> (Ω·cm <sup>2</sup> ) | R <sub>area</sub> (Ω·cm <sup>2</sup> ) |
|-----|----------|----------------------------------------|----------------------------------------|
|     |          | DC                                     | AC                                     |
| 1   | 0.01     | 119.47                                 | 33.78                                  |
| 2   | 0.1      | 11.65                                  | 5.74                                   |
| 3   | 0.3      | 4.35                                   | 3.50                                   |
| 4   | 0.5      | 3.43                                   | 3.13                                   |
| 5   | 0.7      | 3.24                                   | 3.21                                   |
| 6   | 0.9      | 3.47                                   | 3.25                                   |
| 7   | 1.1      | 3.41                                   | 3.04                                   |

**Table S3.** Resistances of CMX measured at 298 K with direct current (DC) and with alternating current (AC).**3. Composition of the solutions used for testing Fuji-CEM-80050 as presented in Figure 7.**

Source: Avci et al. 2016 [3].

| Exp | NaCl (M) | MgCl <sub>2</sub> (M) | R <sub>area</sub> (Ω·cm <sup>2</sup> ) |
|-----|----------|-----------------------|----------------------------------------|
| 1   | 1        | 0                     | 3.284                                  |
| 2   | 0.9      | 0.1                   | 8.579                                  |
| 3   | 0.8      | 0.2                   | 11.6                                   |
| 4   | 0.6      | 0.4                   | 18.5                                   |
| 5   | 0.4      | 0.6                   | 22.52                                  |
| 6   | 0.2      | 0.8                   | 24.4                                   |
| 7   | 0        | 1                     | 26.88                                  |

**Table S4.** Resistances of Fuji-CEM-80050 CMX measured at 298 K.**4. Composition of the solutions used for testing AMX and CMX as presented in Figure 7.**

Source: Kuno et al. 2017 [4].

| Exp | NaCl (M) | MgSO <sub>4</sub> (M) | R <sub>area</sub> (Ω·cm <sup>2</sup> ) | R <sub>area</sub> (Ω·cm <sup>2</sup> ) |
|-----|----------|-----------------------|----------------------------------------|----------------------------------------|
|     |          |                       | AMX                                    | CMX                                    |
| 1   | 0.508    | 0                     | 2.122                                  | 2.175                                  |
| 2   | 0.4826   | 0.0254                | 2.443                                  | 3.61                                   |
| 3   | 0.4572   | 0.0508                | 2.499                                  | 4.196                                  |
| 4   | 0.381    | 0.127                 | 2.613                                  | 5.902                                  |
| 5   | 0.254    | 0.254                 | 2.891                                  | 9.151                                  |
| 6   | 0        | 0.508                 | 4.244                                  | 14.48                                  |

**Table S5.** Resistances of AMX and CMX. .

## 5. Specifications of the discussed membranes.

| Specs                                 | FAS-50                    | FKS-50          | FAS-PET-75       | FKS-PET-75      | CMX                           | AMX                                             | Fuji-CEM-80050                                  |
|---------------------------------------|---------------------------|-----------------|------------------|-----------------|-------------------------------|-------------------------------------------------|-------------------------------------------------|
| Manufacturer                          | Fumatec BWT GmbH, Germany |                 |                  |                 | ASTOM Co., Ltd, Japan         |                                                 | Fujifilm B.V. The Netherlands                   |
| Type                                  | AEM                       | CEM             | AEM              | CEM             | AEM                           | CEM                                             | CEM                                             |
| Ref.                                  | [5]                       | [5]             | [5]              | [5]             | [6] [7]                       | [6] [7]                                         | [4]                                             |
| Exchange group                        | ~Br <sup>-</sup>          | ~H <sup>+</sup> | ~Br <sup>-</sup> | ~H <sup>+</sup> | ~SO <sub>3</sub> <sup>-</sup> | ~N <sup>+</sup> (CH <sub>3</sub> ) <sub>3</sub> | ~N <sup>+</sup> (CH <sub>3</sub> ) <sub>3</sub> |
| Backbone                              | PET                       | PET             | PET              | PET             | Styrene + divinylbenzene      |                                                 | polyolifin                                      |
| Reinforcement                         | no                        | no              | PET              | PET             | PVC                           |                                                 | Electrospun nanofibers                          |
| Thickness (μm)                        | 45 - 55                   | 45 - 55         | 70-80            | 74 - 87         | 164                           | 134                                             | 114 ± 2                                         |
| IEC (meq/g)                           | 1.6 - 2.0                 | 1.2 - 1.4       | 1.2-1.4          | 1.0 - 1.25      | 1.62                          | 1.25                                            | 1.1 ± 0.1                                       |
| R <sub>area</sub> (Ωcm <sup>2</sup> ) | 0.6 - 1.5                 | 1.8 - 2.5       | 1.2-2.0          | < 2.5           | 2.91                          | 2.35                                            | 3.0                                             |
| Perm-selectivity (%)                  | 92 - 96                   | 97 - 99         | 94-97            | > 95            | 99.0                          | 90.7                                            | -                                               |
| H <sub>2</sub> O up-take (%)          | 10 - 25                   | 10 - 20         | 15-25            | -               | 18                            | 16                                              | -                                               |
| CD meq/gH <sub>2</sub> O              | 14.4                      | 8.0             | 12.0             | -               | 9.0                           | 7.8                                             | 2.4                                             |

## 6. Experimental techniques

| Applied                  | Gómez-Coma et al.    | Gómez-Coma et al.        | Galama et al.                        | Kuno et al. | Avci et al.                          |
|--------------------------|----------------------|--------------------------|--------------------------------------|-------------|--------------------------------------|
| Ref.                     | [1]                  | This paper               | [2]                                  | [4]         | [3]                                  |
| Membranes                | FAS-50<br>FKS-50     | FAS-PET-75<br>FKS-PET-75 | CEM                                  | AMX<br>CMX  | Fuji-CEM-80050                       |
| Preconditioning          | .                    | 24 h                     | 3 x 24 h                             | ?           | 3 x 8 h                              |
| Temp. (K)                | 297                  | 297                      | 298                                  | ?           | 298                                  |
| Compartments in cell     | 2                    | 2                        | 6                                    | 2           | 2                                    |
| Work /counter electrodes | Hg<br>Direct contact | Hg<br>Direct contact     | .Pt covered Ti                       | ?           | Ag/AgCl covered Ag                   |
| Reference electrodes     | no                   | no                       | Ag/AgCl via Haber-Luggin capillaries | no          | Ag/AgCl via Haber-Luggin capillaries |

## References

- [1] Gómez-Coma, L.; Ortiz-Martínez, V.M.; Carmona, J.; Palacio, L.; Prádanos, P.; Fallanza, M.; Ortiz, A.; Ibañez R.; and Ortiz, I. "Modeling the influence of divalent ions on membrane resistance and electric power in reverse electrodialysis," *Journal of Membrane Science*, 2019, 592, 117385, <https://doi.org/10.1016/j.memsci.2019.117385>.

- [2] Galama, A.H.; Vermaas, D.A.; Veerman, J.; Saakes, M.; Rijnaarts, H.H.M.; Post J.W.; and Nijmeijer, K. "Membrane resistance: The effect of salinity gradients over a cation exchange membrane," *Journal of Membrane Science*, 2014, 467, 279-291; <https://doi.org/10.1016/j.memsci.2014.05.046>.
- [3] Avci, A.H.; Sarkar, P.; Tufa, R.A.; Messina, D.; Argurio, P.; Fontananova, E.; Di Profio G.; and Curcio, E. "Effect of  $Mg^{2+}$  ions on energy generation by reverse electrodialysis," *Journal of Membrane Science* 2016, 520, 499-506; <http://dx.doi.org/10.1016/j.memsci.2016.08.007>.
- [4] Kuno, M.; Yasukawa, M.; Kakihana Y.; and Higa, M. " The effect of divalent ions on reverse electrodialysis power generation system," *Bull. Soc. Sea Water Sci., Jpn.*, 2017, 71, 350- 351.
- [5] <https://www.fuelcellstore.com/fuel-cell-components/membranes> (accessed on 24 January 2023).
- [6] Długołęcki, P.; Nymejier, K.; Metz, S.; and Wessling, M. "Current status of ion exchange membranes for power generation from salinity gradients," *Journal of Membrane Science* 319-1,2 (2008) 214-222; <https://doi.org/10.1016/j.memsci.2008.03.037>.
- [7] V. Sarapulova, I. Shkorkina, S. Mareev, N. Pismenskaya, N. Kononenko, C. Larchet, L. Dammak and V. Nikonenko, "Transport Characteristics of Fujifilm Ion-Exchange Membranes as Compared to Homogeneous Membranes AMX and CMX and to Heterogeneous Membranes MK-40 and MA-41," *Membranes* 9-7 (2019) 84; [doi:10.3390/membranes9070084](https://doi.org/10.3390/membranes9070084).

**Disclaimer/Publisher's Note:** The statements, opinions and data contained in all publications are solely those of the individual author(s) and contributor(s) and not of MDPI and/or the editor(s). MDPI and/or the editor(s) disclaim responsibility for any injury to people or property resulting from any ideas, methods, instructions or products referred to in the content.
